# Supplementary material for: Engineering functional alginate beads for encapsulation of Pickering emulsions stabilized by colloidal particles
Source: Royal Society of Chemistry journal article supplement (doi:10.1039/c6ra21755a), 2016-01-01
Supplement: c6ra21755a1.pdf [file c6ra21755a1.pdf]

Table S1. Mean Droplet Size ( $d_{4,3}$ ) of Oil-in-Water Emulsions Stabilized with zein-TA/Ca<sup>2+</sup> Particles. The results were displayed as the mean  $\pm$  standard deviation (n=3).

| Samples                              | $D_{4,3}(\mu\text{m})$ |
|--------------------------------------|------------------------|
| Z <sub>1</sub> -TA/Ca <sub>50</sub>  | 45.47 $\pm$ 0.9        |
| Z <sub>2</sub> -TA/Ca <sub>75</sub>  | 34.64 $\pm$ 1.2        |
| Z <sub>3</sub> -TA/Ca <sub>100</sub> | 101.91 $\pm$ 2.2       |

Z<sub>1</sub>-TA/Ca<sub>50</sub> represented zein-TA/Ca<sup>2+</sup> NPs at zein concentration of 0.1% with the initial used metal ion concentration of 50 mM; Z<sub>2</sub>-TA/Ca<sub>75</sub> represented zein-TA/Ca<sup>2+</sup> NPs at zein concentration of 0.2% with the initial used metal ion concentration of 75 mM; Z<sub>3</sub>-TA/Ca<sub>100</sub> represented zein-TA/Ca<sup>2+</sup> NPs at zein concentration of 0.3% with the initial used metal ion concentration of 100 mM.
